# Supplementary material for: Target-triggered ‘colorimetric-fluorescence’ dual-signal sensing system based on the versatility of MnO2 nanosheets for rapid detection of uric acid
Source: Royal Society of Chemistry journal article supplement (doi:10.1039/d3ay00950e), 2023-01-01
Supplement: d3ay00950e1.pdf [file d3ay00950e1.pdf]

## Supporting Information

Target-triggered 'colorimetric-fluorescence' dual-signal sensing system based on the versatility of MnO<sub>2</sub> nanosheets for rapid detection of uric acid

Hao Liang<sup>a#</sup>, Danliang Li<sup>a,b#</sup>, Xuebing Zhang<sup>a</sup>, Deshuai Zhen<sup>a</sup>, Yunfei Li<sup>a</sup>, Yuchen Luo<sup>a</sup>,

Yuyun Zhang<sup>a</sup>, Dongyun Xu<sup>c</sup>, Lili Chen<sup>a\*</sup>

<sup>a</sup> Department of public health laboratory sciences, school of public health, Hengyang Medical School, University of South China, Hengyang, Hunan, China

<sup>b</sup> Zhuzhou Hetang District Center for Disease Control and Prevention, Zhuzhou, Hunan, China

<sup>c</sup> Hengyang Center for Disease Control and Prevention, Hengyang, Hunan, China

Corresponding author:

chlili720612@163.com (\*Prof. Lili Chen)

## RESULTS

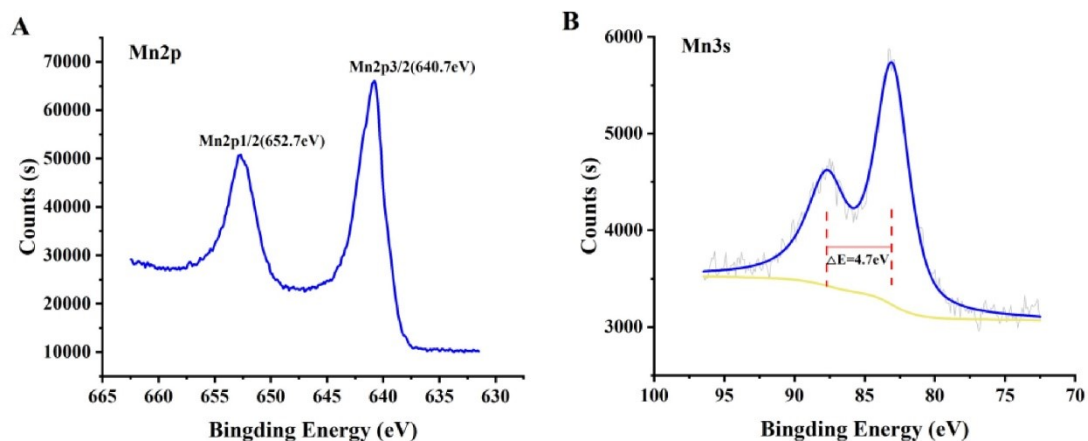

**Fig. S1.** High resolution XPS spectrum of MnO<sub>2</sub> nanosheet for Mn2p (A) and Mn3s (B), respectively.

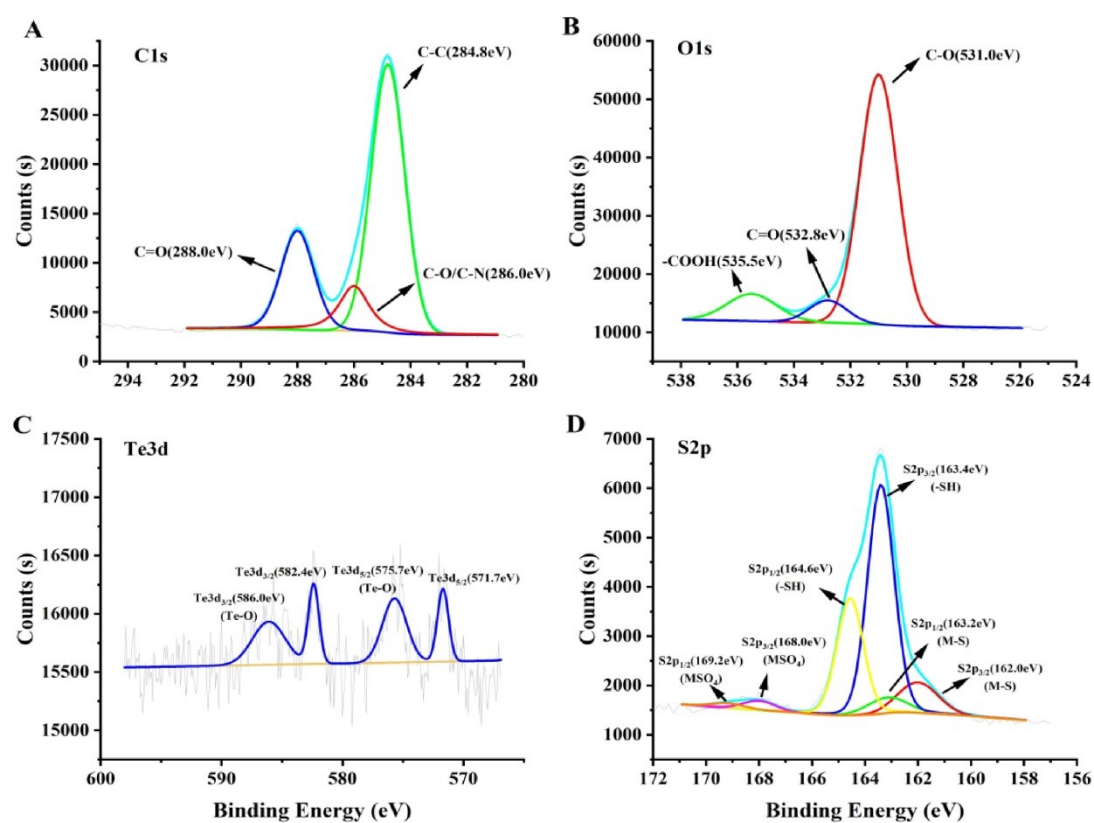

**Fig. S2.** High resolution XPS spectrum of CdZnTeS QDs for C1s (A), O1s (B), Te3d (C) and S2p (D), respectively.

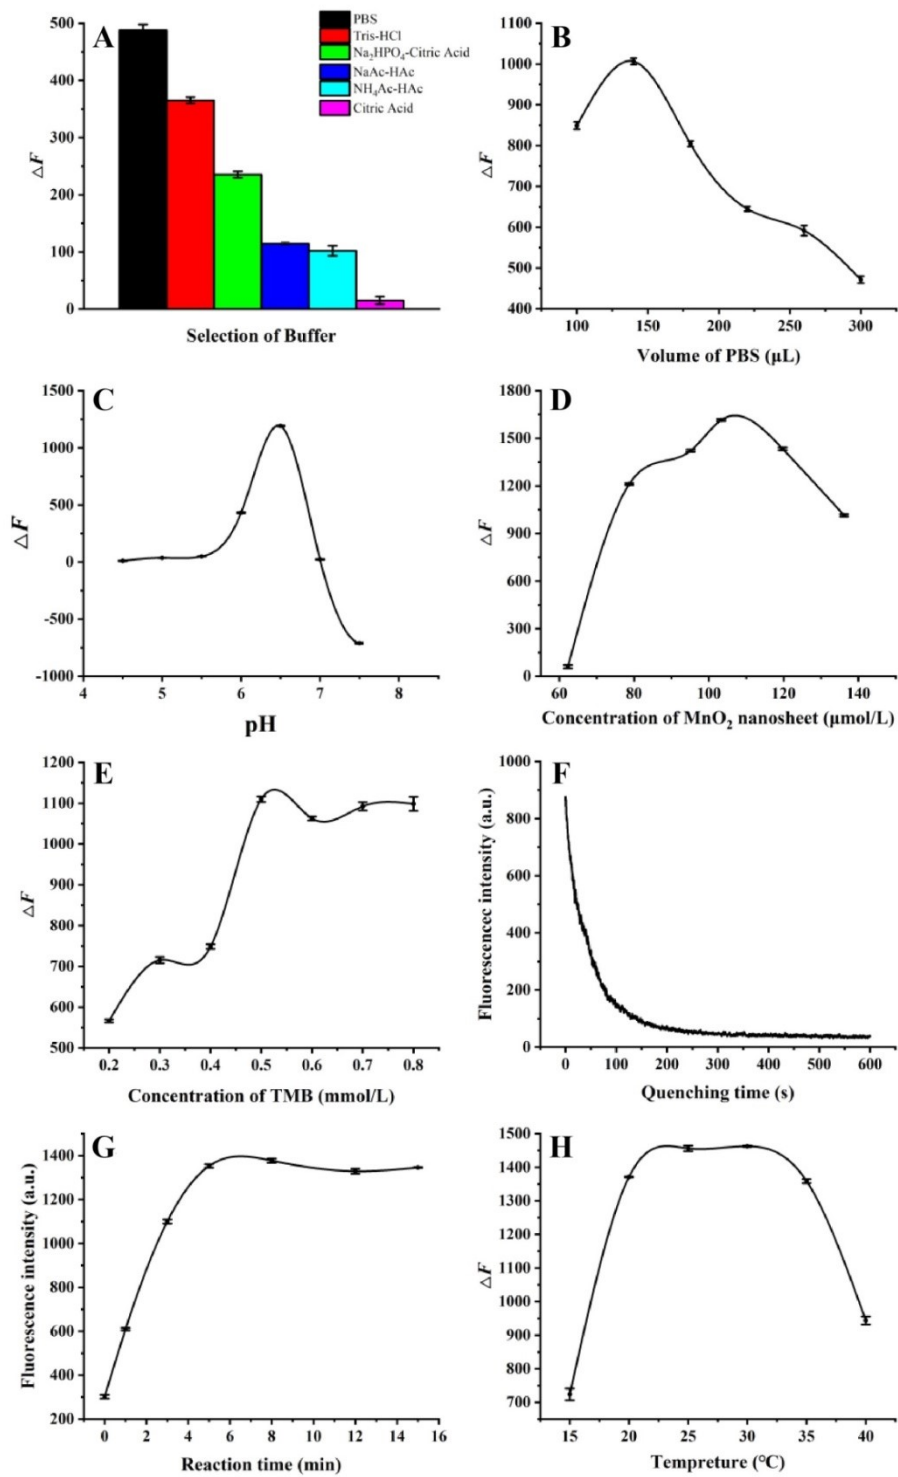

**Fig. S3.** Optimization of experimental conditions. (A) Type of buffer. (B) pH. (C) Volume of PBS. (D) Concentration of TMB. (E) Concentration of  $\text{MnO}_2$  nanosheet. (F) Quenching of detection system fluorescence over time. (G) Recovery of detection system fluorescence over time. (H) Temperature.

**Table S1.** Detection results of UA spiked in 5% human serum (n=6)

| Samples        | Detection mode | Spiked( $\mu\text{mol/L}$ ) | Measured( $\mu\text{mol/L}$ ) | Recovery(%) | RSD(%) |
|----------------|----------------|-----------------------------|-------------------------------|-------------|--------|
| 5% human serum | Colorimetric   | 10.00                       | 9.50                          | 95.05       | 3.36   |
|                |                | 30.00                       | 31.32                         | 104.40      | 1.78   |
|                |                | 50.00                       | 50.28                         | 100.55      | 3.79   |
|                | Fluorescence   | 20.00                       | 19.89                         | 99.45       | 2.20   |
|                |                | 60.00                       | 60.91                         | 101.52      | 4.26   |
|                |                | 100.000                     | 101.54                        | 101.54      | 2.51   |
